# An efficient extension of N-mixture models for multi-species abundance estimation

Juan Pablo Gomez<sup>1,2,\*</sup> and Scott K. Robinson<sup>2</sup>José Miguel Ponciano<sup>1,\*</sup>

<sup>1</sup>Department of Biology, University of Florida, Gainesville, Florida

<sup>2</sup>Florida Museum of Natural History, Gainesville, Florida

<sup>\*</sup>*Correspondence author*

## Abstract

1  
2 1. In this paper, through an extension of the N-mixture family of models,  
3 we achieve a significant improvement of the statistical properties of the rare  
4 species abundance estimators when sample sizes are low, yet of typical size  
5 in neotropical bird studies. The proposed method harnesses information from  
6 other species in the targeted ecological community to correct each species' esti-  
7 mator. We provide guidance to determine the sample size required to estimate  
8 accurately the abundance of rare neotropical bird species.

9 2. We evaluate the proposed methods using an assumption of 50m fixed  
10 radius point count and perform simulations comprising a broad range of sample  
11 sizes, true abundances and detectability values. The extension of the N-mixture  
12 model is achieved by assuming that the detection probabilities of a set of species  
13 are all drawn at random from a beta distribution. This hierarchical model  
14 avoids having to specify one detection probability parameter per species in the  
15 targeted community. Parameter estimation is done via Maximum Likelihood  
16 using data cloning.

17           3. We compared our methodology with standard N-mixture models, which  
18 we show here are severely biased and highly variable when the true abundances  
19 of species in the community are less than seven individuals per 100ha. For  
20 more common species, the number of point counts and replicates needed to  
21 reduce the bias of N-mixture model estimators estimation is high. The beta  
22 N-mixture model proposed here outperforms the traditional N-mixture model  
23 thus allowing the estimation of organisms at lower densities and control of the  
24 bias in the estimation.

25           4. We illustrate how our methodology can be used to determine the sample  
26 size required to estimate the abundance of organisms. We also give practical  
27 advice for researchers seeking to propose reliable sampling designs for single  
28 species' studies. When the interest is full communities, our model and esti-  
29 mation methodology can be seen as a practical solution to estimate organism  
30 densities from rapid inventories datasets. The statistical inferences with this  
31 model can also inform differences in ecology and behavior of species when they  
32 violate the assumption of a single distribution of detectabilities.

33 **Keywords:** Point Counts, Sample size estimation, Tropical Bird Species, Hierarchi-  
34 cal models, Data cloning.

## 35 **1 Introduction**

36 One of the most common complications that ecologists face when estimating abun-  
37 dances of mobile organisms is that individuals and species differ in their detection  
38 probability. Such differences results in the under or overestimation of real abundance  
39 when the detection probability is ignored (MacKenzie *et al.*, 2002; Martin *et al.*,  
40 2005; Royle & Dorazio, 2008). To date, quantitative ecologists have proposed many  
41 statistical methods to estimate the detection probabilities and correct the observed  
42 individual counts to estimate either density or abundance (Denes *et al.*, 2015).

43 N-mixture models are a family of hierarchical models in which the counts of  
44 species  $y$  are binomially distributed with  $N$  being the total number of individuals  
45 available for detection and  $p$  the probability of detecting an individual of that species  
46 (Royle, 2004). Because  $N$  is not known, it is considered to be a latent variable  
47 that is a product of some discrete distribution, such as the Poisson probability law.  
48 Inferences about the abundance of the species of interest therefore rely on estimating  
49 the detection probability and the underlying parameter of the distribution giving  
50 rise to  $N$  (Royle, 2004). Although their use has been widely advocated, very few  
51 examples exist of the use of N-mixture models for estimation of the abundance of  
52 neotropical bird species. Most of the density estimation for bird populations in the  
53 Neotropics comes from sampling of 100-ha plots using intensive field methods such  
54 as spot mapping or repeated mist-netting (Terborgh *et al.*, 1990; Thiollay, 1994;  
55 Robinson *et al.*, 2000; Blake, 2007). A probable reason for the sparse use of N-  
56 mixture models to estimate densities of neotropical birds is the well documented  
57 species abundance distributions of tropical organisms, which have a long tail to the  
58 right with very few abundant species and many rare ones (Hubbell, 2001). This is  
59 reflected in Parker III *et al.* (1996) database, in which they consider a bird to be  
60 common in the Neotropics if its population abundance is higher than 15 ind/100  
61 ha. This high proportion of rare species in the overall community makes it difficult  
62 to obtain enough detections during field censuses for appropriate estimation of both  
63 abundance and detection probability for many, if not the majority of neotropical bird  
64 species.

65 To ensure independence of point counts used to estimate the abundance of  
66 neotropical bird species, ornithologists have suggested that points must be at least  
67 200 m apart and the radius of the point count cannot be larger than 50 m (Ralph *et al.*,  
68 1993, 1995; Matsuoka *et al.*, 2014). If the goal is to estimate the abundance of all  
69 species on a 100 ha plot (minimum area suggested to correctly describe a lowland local

70 bird community in the neotropics; Terborgh *et al.*, 1990), considering the restrictions  
71 described above, the maximum number of points that fit in a 100 ha plot is 36 points  
72 of 0.78 ha each, based on a radius of 50m. Because of the excess of rarity in tropical  
73 birds, the majority of species will have abundances below 15 ind/100 ha. Assuming  
74 that individuals are homogeneously distributed across the plot, and hence their counts  
75 Poisson distributed (Pielou, 1969), the expected number of individuals in each point  
76 count is  $\lambda \approx 0.12 \frac{\text{individuals}}{\text{point count}}$ . This value of  $\lambda$  is well below the  $\lambda = 2$  used to evaluate  
77 the performance of the N-mixture model (Royle, 2004). Below this value, it is not  
78 known how the model estimators perform, even though  $\lambda < 2$  may be a very common  
79 scenario in neotropical bird communities. In addition, several neotropical species are  
80 known to be secretive and therefore have low detection probabilities, which imposes  
81 even stronger challenges for estimating their abundance. Our first objective in this  
82 study was to determine the minimum sample size required to reliably estimate the  
83 abundance of neotropical bird species using N-mixture models, given a desired level  
84 of precision (say, 10%). We believe that this objective will be particularly useful for  
85 population ecologists whose goal is to obtain a rough estimate of the density of a  
86 species without having to use one of the most field-intensive bird counting methods  
87 known as spot-mapping (*e.g.* Terborgh *et al.*, 1990).

88         A secondary goal of this paper is to develop a method to estimate the abun-  
89 dance of all of the species present in a community, in order to infer mechanisms  
90 driving species abundance distributions, which is an important issue in the current  
91 debates over the Unified theory (Hubbell, 2001; McGill *et al.*, 2007). While perform-  
92 ing point counts, an observer can easily count all of the individual birds in the area  
93 for a particular amount of time irrespective of the identity of the species. Thus, the  
94 actual data will have information about all of the species present in the area and an  
95 approximation of their abundance. Because of their behavior, foraging strategy and  
96 evolutionary relationships, some, if not most of the species in the community can

97 have very similar detection probabilities. Such similarities in detectabilities justify  
98 our approach of using the counts of the species in the targeted community to increase  
99 the information available on abundance corrected by detection probability. Thus, we  
100 expanded the N-mixture models to a scenario in which we used information from  
101 multiple species to estimate the parameters of a detection probability distribution  
102 of a set of species, and used such probability distribution to estimate the expected  
103 abundance per unit area of each of the species in the set.

## 104 1.1 The Model

105 In the following section, after summarizing the widely used N-mixture models, we  
106 develop a parsimonious, multi-species model extension that allows a more accurate  
107 estimation of the abundance of rare species. The essential contribution of our ap-  
108 proach is the use of information from the counts of ecologically similar species to  
109 improve the estimation of both detectability and abundance.

110 Using an N-mixture model, we usually let  $y_{ij}$  be the number of individuals  
111 for a given species in the  $i$  –  $th$  sampling unit (a point count) and  $j$  –  $th$  replicate  
112 of the sampling unit (or visit to the point count). Let  $p$  be the individual detection  
113 probability for that species. Finally, let  $n_i$  be the fixed number of individuals available  
114 for detection in the  $i$  –  $th$  sampling unit. If we assume that the counts are binomially  
115 distributed, the likelihood of the counts for a given species is

$$\mathcal{L}(y_{ij}; n_i, p) = \prod_{i=1}^r \prod_{j=i}^t \binom{n_i}{y_{ij}} p^{y_{ij}} (1-p)^{n_i-y_{ij}}.$$

116 for  $i = 1, 2, 3 \dots r$  and  $j = 1, 2, 3 \dots t$ , where  $r$  is the total number of point counts  
117 sampled and  $t$  is the number of times each point count was visited (Royle, 2004).

118 The N-mixture model assumes that the number of individuals available for  
119 detection is in fact unknown and random. Thus, such a number is considered to be

120 a latent variable, modeled with a Poisson process with mean  $\lambda$  (the mean number of  
 121 individuals per sampling unit). From here on, we write  $N_i \sim \text{Pois}(\lambda)$ , where we have  
 122 used the convention that lowercase letters such as  $n_i$  denote a particular realization  
 123 of the (capitalized) random variable  $N_i$ . To compute the likelihood function, one  
 124 then has to integrate (sum, in this case) the binomial likelihood over all the possible  
 125 realizations of the Poisson process,

$$\mathcal{L}(y_{ij}; \lambda, p) = \prod_{i=1}^r \sum_{N_i=\max(\mathbf{y}_i)}^{\infty} \prod_{j=1}^t \binom{N_i}{y_{ij}} p^{y_{ij}} (1-p)^{N_i-y_{ij}} \frac{e^{-\lambda} \lambda^{N_i}}{N_i!}, \quad (1)$$

126 where  $\mathbf{y}_i = \{y_{i1}, y_{i2}, \dots, y_{it}\}$ . If the objective is to estimate the abundance of  $S$   
 127 species, the overall likelihood is simply written as the product of all the individual  
 128 species' likelihoods, *i.e.*,

$$\mathcal{L}(y_{sij}; \underline{\lambda}, \underline{p}) = \prod_{s=1}^S \prod_{i=1}^r \sum_{N_{si}=\max(\mathbf{y}_{si})}^{\infty} \prod_{j=1}^t \binom{N_{si}}{y_{sij}} p_s^{y_{sij}} (1-p_s)^{N_{si}-y_{sij}} \frac{e^{-\lambda_s} \lambda_s^{N_{si}}}{N_{si}!}, \quad (2)$$

129 where  $y_{sij}$  is a three dimensional array of dimensions  $r \times t \times S$ , and both  $\underline{\lambda} =$   
 130  $\{\lambda_1, \dots, \lambda_S\}$  and  $\underline{p} = \{p_1, \dots, p_S\}$  are vectors of length  $S$ . Writing the likelihood  
 131 in this way directly implies that in order to estimate the abundance of all the species  
 132 present in a community, one would need to estimate  $2 \times S$  parameters ( $S$  mean num-  
 133 ber of individuals  $\lambda_s$  plus  $S$  detection probabilities  $p_s$ ). To avoid the proliferation of  
 134 parameters one could assume that all the  $p_s$  come from a single probability model  
 135 that describes the community-wide distribution of detection probabilities. These  
 136 community-wide detection probabilities, for example, can be modeled with a beta  
 137 distribution in which we let  $P_s \sim \text{Beta}(\alpha, \beta)$ . The probability density function of the  
 138 random detection probabilities is then  $g(p_s; \alpha, \beta) = \frac{\Gamma(\alpha+\beta)}{\Gamma(\alpha)\Gamma(\beta)} p_s^{\alpha-1} (1-p_s)^{\beta-1}$ .  
 139 The overall likelihood function now integrates over all the realizations of the community-  
 140 wide detection probabilities  $P_s$ :

$$\begin{aligned} \mathcal{L}(y_{sij}; \underline{\lambda}, \alpha, \beta) = & \int_0^1 \prod_{s=1}^S \prod_{i=1}^r \sum_{N_{si}=\max(\mathbf{y}_{si})}^{\infty} \prod_{j=1}^t \binom{N_{si}}{y_{sij}} p_s^{y_{sij}} (1-p_s)^{N_{si}-y_{sij}} \frac{e^{-\lambda_s} \lambda_s^{N_{si}}}{N_{si}!} \\ & \times \frac{\Gamma(\alpha + \beta)}{\Gamma(\alpha)\Gamma(\beta)} p_s^{\alpha-1} (1-p_s)^{\beta-1} dp_s. \end{aligned} \tag{3}$$

141 The difference of the former and the latter forms of the N-mixture model is that in  
142 the latter you need  $S+2$  parameters to estimate the abundance of the full community  
143 instead of  $2 \times S$ . In large communities, this might be a significant decrease of param-  
144 eters. The usefulness of specifying the likelihood is that in the case in which many  
145 species are rare, we can use the information on the abundant species to estimate the  
146 detection probability, leaving the actual counts to estimate only the abundance of the  
147 species. Note that by integrating the beta process at the outmost layer of the model,  
148 we are following the sampling structure. When this approach is used and the integral  
149 is tractable, the resulting distribution is a multivariate distribution with a specific  
150 covariance structure (Sibuya *et al.*, 1964). Thus, we expect our approach to result  
151 in a multivariate distribution of counts with a covariance structure arising naturally  
152 from the sampling design and the assumed underlying beta process of detectabilities.

## 153 **1.2 Maximum Likelihood Estimation**

154 One drawback of the beta-N-mixture model is its computational complexity, which  
155 imposes a substantial numerical challenge for Maximum Likelihood (ML) estimation.  
156 To date, many numerical approximations for obtaining the Maximum Likelihood Es-  
157 timates (MLEs) for hierarchical models have been proposed (de Valpine, 2012). Of  
158 these, the so-called “Data Cloning” methodology has proven to be a reliable approach

159 to not only obtain the MLEs for these types of models, but also for hypothesis testing  
160 and model selection, as well as unequivocally measuring the estimability of parameters  
161 (Lele *et al.*, 2010; Ponciano *et al.*, 2009). The method proposed by Lele *et al.* (2007,  
162 2010) uses the Bayesian computational approach coupled with Monte Carlo Markov  
163 Chain (MCMC) to compute Maximum Likelihood Estimates (MLE) of parameters of  
164 hierarchical models and their asymptotic variance estimates (Lele *et al.*, 2007). The  
165 advantage of using the data cloning protocol is that there is no need to find the exact  
166 or numerical solution to the likelihood function of the hierarchical model in order to  
167 find the MLE. Instead, one only needs to compute means and variances of certain  
168 posterior distributions.

169 Data Cloning proceeds by performing a typical Bayesian analysis on a dataset  
170 that consists of  $k$  copies of the originally observed data set. In other words, to  
171 implement this method, one has to write the likelihood function of the data as if  
172 by pure happenstance, one had observed  $k$  identical copies of the data set at hand.  
173 Then, Lele *et al.* (2007, 2010) show that as  $k$  grows large, the mean of the resulting  
174 posterior distribution converges to the MLE. In addition, for continuous parameters  
175 as  $\underline{\lambda}$ ,  $\alpha$ , and  $\beta$ , the variance covariance matrix of the posterior distribution converges  
176 to  $\frac{1}{k}$  times the inverse of the observed Fisher's information matrix. In this way, the  
177 variance estimated by the posterior distribution can be used to calculate Wald-type  
178 confidence intervals of the parameters (Lele *et al.*, 2007, 2010). The advantage of data  
179 cloning over traditional Bayesian algorithms is that while in Bayesian algorithms the  
180 prior distribution might have some influence over the posterior distribution, in data  
181 cloning the choice of the prior distribution does not determine the resulting estimates  
182 because these are the MLEs. In our case, the hierarchical model is of the form



$$\mathbf{Y} \sim \text{Binomial}(\underline{\mathbf{N}}, \mathbf{P}) = f(y|\underline{\mathbf{N}} = n, \mathbf{P} = p) \quad (\text{Observation model}),$$

$$\underline{\mathbf{N}} \sim \text{Pois}(\underline{\lambda}) = g(\underline{\mathbf{N}}; \underline{\lambda}) \quad (\text{Process model}),$$

$$\mathbf{P} \sim \text{Beta}(\alpha, \beta) = h(\mathbf{P}; \alpha, \beta) \quad (\text{Process model}).$$

183  $\underline{\mathbf{N}}$  and  $\mathbf{P}$  are unobserved quantities or latent variables which are products of a stochastic  
184 process given by the Poisson and Beta distributions respectively. Furthermore, the  
185 parameters left to be estimated (i.e.,  $\underline{\lambda}, \alpha, \beta$ ) are seen as random variables themselves  
186 that have a posterior distribution  $\pi(\underline{\lambda}, \alpha, \beta|\mathbf{Y})$ . A typical Bayesian approach would  
187 sample from the following posterior distribution:

$$\pi(\underline{\lambda}, \alpha, \beta, \underline{\mathbf{N}}, \mathbf{P}|\mathbf{Y}) \propto [f(y|\underline{\mathbf{N}} = n, \mathbf{P} = p)g(\underline{\mathbf{N}}; \underline{\lambda})h(\mathbf{P}; \alpha, \beta)] \pi(\underline{\lambda}, \alpha, \beta),$$

188 where  $\pi(\underline{\lambda}, \alpha, \beta)$  is the joint prior of the model parameters. This approach would  
189 yield many samples of the vector  $(\underline{\lambda}, \alpha, \beta, \underline{\mathbf{N}}, \mathbf{P})$  and in order to sample from the  
190 marginal posterior  $\pi(\underline{\lambda}, \alpha, \beta|\mathbf{Y})$  one only needs to look at the samples of the subset of  
191 parameters  $(\underline{\lambda}, \alpha, \beta)$ . The data cloning approach proceeds similarly, except one needs  
192 to sample from the following posterior distribution:

$$\pi(\underline{\lambda}, \alpha, \beta, \underline{\mathbf{N}}, \mathbf{P}|\mathbf{Y})^{(k)} \propto [f(y|\underline{\mathbf{N}} = n, \mathbf{P} = p)g(\underline{\mathbf{N}}; \underline{\lambda})h(\mathbf{P}; \alpha, \beta)]^k \pi(\underline{\lambda}, \alpha, \beta).$$

193 The notation  $^{(k)}$  on the left side of this equation does not denote an exponent and  
194 is only there to denote the number of times the data set was “cloned”. On the  
195 right hand side, however,  $k$  is an exponent of the likelihood function. The MLEs of  
196  $\underline{\lambda}, \alpha, \beta$  are then simply obtained as the empirical average of the posterior distribution

197  $\pi(\underline{\lambda}, \alpha, \beta | \mathbf{Y})^{(k)}$  and the variance of the estimates are given by  $\frac{1}{k}$  times the variance  
198 of this posterior distribution. For a detailed example that illustrates the calculations  
199 with posterior and cloned posterior distributions that are analytical and tractable,  
200 and where the MLEs can be easily computed, we refer the reader to Ponciano *et al.*  
201 (2012).

### 202 **1.3 Scenarios In Which $p_s$ Seem To Be Correlated Among** 203 **Neotropical Bird Species**

204 Several scenarios can arise in which  $p_s$  seem to be correlated among species. It is  
205 widely known that the probability of detecting diurnal species such as birds that de-  
206 fend territories by singing is highest at or right after dawn and decreases with time  
207 of day (Blake, 1992). Also, different types of forests have differences in structural  
208 characteristics that allow or hinder the detection of all of the individuals available.  
209 Thus, species sharing a microhabitat or even inhabiting a particular ecosystem should  
210 have similar detection probabilities. Operationally, this would amount to specifying  
211 a detection probability distribution that depends on variables such as time of the day,  
212 or forest structure indices or characteristics. Another natural phenomenon dictating  
213 the form of the detection probabilities is the ubiquitous foraging behavior and phe-  
214 nomenon in the Neotropics known as “mixed-species flocking” (Munn & Terborgh,  
215 1979). These flocks are formed by individuals of different species that forage in groups,  
216 with each species segregating into their own forest micro-habitat yet moving together  
217 through the jungle. Thus the overall detection of the species in the flock appears as  
218 correlated because once you detect one species, you are likely to detect the rest of  
219 the species within the flock. Finally, several foraging behaviors and vocal activity  
220 patterns make species particularly easy or difficult to detect. Species that forage  
221 using a sit and wait behavior are usually much more difficult to detect than species  
222 that forage by gleaning on leaves actively searching for food, although there are some

223 species whose high vocalization rates make them easier to detect irrespective of their  
224 foraging guild. Thus, sit and wait foragers may be either easy or very difficult to  
225 detect (e.g. *Monasa* vs. *Malacoptila*, puffbirds).

## 226 **2 Methods**

### 227 **2.1 Sample Size Estimation for Neotropical Birds**

228 To determine the minimum sample size required for accurate estimation of the abun-  
229 dance of neotropical species, we used a series of simulations in which we varied the  
230 number of points ( $r$ ), visits to points ( $t$ ), mean number of individuals in each point  
231 ( $\lambda$ ) and detection probability ( $p$ ). We varied  $r$  between 5 and 50,  $t$  between 2 and 20,  
232  $\lambda = 1, 2, 3, 4, 5, 7, 10, 15, 25, 40, 55, 65, 75, 85, 100$  and  $p$  between 0.1 and 0.9. For each  
233 combination of parameters, we simulated 170 data sets and estimated  $\lambda$  and  $p$  using  
234 equation 1 for each of the 170 datasets and each of the parameter combinations. In  
235 each simulation, we computed the relative bias of the abundance estimate by using,  
236  $bias = \frac{\hat{\lambda} - \lambda}{\lambda}$ , where  $\hat{\lambda}$  is the MLE for a particular data set and  $\lambda$  is the true value  
237 of the parameter used to simulate the data. Finally, we retained the mean bias for  
238 each combination of the model parameters. We could not retain the full distribution  
239 of the bias because of the large number of simulations performed (10,935,000). We  
240 considered an acceptable bias to be lower than 0.1, which is a 10% difference between  
241 the estimate and the true population density. All of the simulations were performed  
242 using R statistical software v.3.0.2 (R Core Team, 2013) and maximum likelihood  
243 estimation by maximizing the likelihood of eq (1) using the optim function with the  
244 Nelder-Mead algorithm. The R code used for simulations and maximum likelihood  
245 estimation is presented in the Appendix B.

## 2.2 The Beta N-mixture Model

Because 100-ha plots have become the standard for estimating abundances of neotropical birds (Terborgh *et al.*, 1990), we developed our example of the use of the beta N-mixture model using a sampling scenario in 100-ha plot. Assuming that a conservative distance between point counts required for the points to be independent is 200 m we selected the maximum number of points that fit in a square 100 ha plot given this requirement. For this example we used 36 point counts and 5 visits, which is reasonable enough to still be part of a rapid inventory but also has enough information to estimate the abundances of rare species. We simulated 1000 data sets that consisted of 15 species with the same  $\lambda$  values described in the previous simulation and three sets of parameters of the beta distribution. The sets of parameters were  $\alpha = 10, 27, 30$  and  $\beta = 30, 27, 10$ , which account for scenarios of low, mid and high detection probability with the same variance ( $E[p] = 0.25, 0.5, 0.75; \text{Var}[p] = 0.004$ ).

For each of the simulated data sets we estimated  $\lambda$  and  $p$  under the N-mixture model and  $\lambda$ ,  $\alpha$  and  $\beta$  under the beta N-mixture model. Then, we computed the bias in  $\lambda$  in the same way as presented above. We performed maximum likelihood estimation of the parameters under the N-mixture model by optimizing equation 1, with the `optim` function in R using the Nelder-Mead algorithm. To estimate the parameters under the Beta N-mixture model, we also used maximum Likelihood estimation but using Data Cloning (Lele *et al.*, 2007). We used the `rjags` (Plummer, 2014) interface for R to build the models and run the analysis with 2 chains, with 20000 iterations in each chain and retained the parameter values every 100 generations after a burn-in period of 1000 generations.

## 2.3 Example Using Real Data

Finally, we used a data set that consisted of 94 point counts, located in three dry forest patches in Colombia. Each point count was replicated three times from Jan-

272 uary 2013 to July 2014. From this data set, we selected the understory insectivore  
273 species that forage over foliage (Karr *et al.*, 1990; Parker III *et al.*, 1996) to meet the  
274 requirement of the Beta N-mixture model of correlated detection probabilities among  
275 species. In total, we estimated the abundance of 26 species using both the N-mixture  
276 and Beta N-mixture models and compared their fit using AIC following the protocol  
277 presented in Ponciano *et al.* (2009). We are aware that it is likely that the closed  
278 population assumption for this data set does not necessarily hold, but it is unlikely  
279 that populations of species have changed drastically from one year to another during  
280 these years. The point counts were performed in three different forest patches in  
281 the upper Magdalena valley in Central Colombia. To maximize the sample size for  
282 abundance estimation, we lumped the point counts into a single data set, such that  
283 the inferences of species abundances are made for the entire region instead of the  
284 particular patch. The three forest patches were separated by less than 150 km and  
285 were located within the Magdalena valley dry forest ecoregion (Olson *et al.*, 2001).  
286 Because they are in the same ecoregion, the structural variables of the forest are  
287 similar and thus it is unlikely that the detection probabilities vary among patches as  
288 well as the abundance of species, allowing us to lump the data together. Maximum  
289 likelihood estimation for the N-mixture and beta-mixture models were performed in  
290 the same way as described in the previous section. The R code and jags models used  
291 for model selection using *AIC* are presented in the Appendix B

## 292 **3 Results**

### 293 **3.1 Sample Size Estimation for Neotropical Birds**

294 We found that the required minimum sample size needed to accurately estimate the  
295 abundance of neotropical bird species decreased with increasing both  $\lambda$  and  $p$  (Figure  
296 1). For the sample sizes evaluated, there is no combination of point counts and

297 replicates that allows the estimation of abundances with less than 7 individuals/100ha  
298 using N-mixture models (Figure A1). In the 7 ind/100 ha threshold, the effort required  
299 is very high. For example, for species with a probability of detection of 0.5 the required  
300 sample size to obtain a bias lower than 0.1 is around 50 points and more than 6  
301 replicates of each point count or around 40 point counts with more than 10 replicates  
302 (Figure 1,A1). As  $\lambda$  increases the sample size required to estimate appropriately the  
303 abundance of species decreases.

### 304 **3.2 The Beta N-mixture Model**

305 The Beta n-mixture model performed better than the regular N-mixture model for  
306 the data simulated. In both cases, as  $\lambda$  increased, the median of the distribution of  
307  $\hat{\lambda}$  converged to the true value of  $\lambda$  (Figure 2). Such results allow us to conclude that  
308 using the regular N-mixture model, the minimum abundance that the model is able  
309 to estimate is around 10 individuals/100 ha, with a sample size of 36 point counts  
310 replicated each five times (Figure 2). The use of multi-species information to estimate  
311 the abundance of single species had mainly two results: 1) it decreased the variance  
312 in the distribution of  $\hat{\lambda}$  and 2) it improved the ability of the model to estimate lower  
313 densities with similar sample sizes. Using the beta N-mixture model, the minimum  
314  $\lambda$  that the model is able to estimate is around 4 individuals/100 ha and possibly 3  
315 individuals/100 ha.

316 Even though the  $\hat{\lambda}$  distribution has high variance, many outliers and, it tends to  
317 overestimate the density of rare species (Figure 2, A3, A2), it maintains the structure  
318 of the species abundance distribution (Figure 3). This is especially true when the  
319 mean detection probability is at least 0.5 (Figure 3). This is not true for the N-  
320 mixture model, which predicts many more mid-range species and overestimates by  
321 far the abundance of abundant species (Figure 3).

322 The beta N-mixture model also performs well in estimating the distribution

323 of the community's detection probability (Figure 4). The distribution of  $E[p]$  for the  
324 simulations is almost centered in the true value of  $p$ . There is a slight underestimation  
325 of  $p$  when  $p = 0.25$  (Figure 4). However, the model overestimates  $\text{Var}[p]$ , but it  
326 estimates the variance to be similar across the different types of simulations, which  
327 reflects the reality with which the data were simulated (Figure 4).

### 328 **3.3 Example Using Real Data**

329 We present the estimates of  $\hat{\lambda}$  for both models in Table 1, as well as  $\hat{p}$  for each species  
330 estimated using the N-mixture model. For the beta N-mixture case, the model es-  
331 timates that the mean detection probability of an insectivorous bird in the upper  
332 Magdalena Valley was of  $E[p] = 0.2$  with  $\text{Var}[p] = 0.009$  ( $\alpha = 3.15, \beta = 12.7$ ). As-  
333 suming model 1 to be the N-mixture and model 2 to be the beta N-mixture, following  
334 Ponciano *et al.* (2009), the difference in  $AIC$  between the model was extremely high  
335 giving very strong support in favor of the beta model ( $\Delta AIC = 14725.04$ ).

## 336 **4 Discussion**

337 We found that N-mixture models require high sample sizes in both the number of  
338 point counts and the number of replicates of each point to estimate accurately the  
339 abundance of tropical birds. An interesting result is that the models are unable to  
340 accurately estimate rare species with less than 7 ind/ha and a low detection probabil-  
341 ity ( $< 0.5$ ), at least with samples of 50 points and 20 replicates. Our model, uses the  
342 information collected for a set of species to estimate the abundance of rare species.  
343 The beta model is particularly useful for rare species that are detected few times. In  
344 this case, even with high sample sizes, the N-mixture model estimates a very high  $\lambda$   
345 and very low  $p$  (our study and Sóllymos & Lele, 2016) and in some cases resulting in  
346 non-identifiability of  $\lambda$  and  $p$  (Sóllymos & Lele, 2016). This problem is solved with the

347 beta model, in which the detection probability of a rare species can be thought of as  
348 coming from the same probability distribution than its ecologically similar species. In  
349 this way, each species has its own detection probability but is linked through an un-  
350 derlying process that can vary from one set of species to another or from one habitat  
351 to another.

352 N-mixture models can be used if the sampled area is increased to raise  $\lambda$  to  
353 around 2 individuals per unit area. Because this simulation was performed for tropical  
354 forests, we simulated point counts with a 50-m radius. This distance has been pro-  
355 posed to meet the assumption that the detection probability is homogeneous across  
356 the whole sampling area and to increase the detection probability of species within it .  
357 Other methods have relaxed this assumption (e.g. distance sampling Buckland *et al.*,  
358 1993), and recent studies have even suggested methods to perform estimation in a  
359 multi-species fashion (Dorazio & Royle, 2005; Dorazio *et al.*, 2015; Sollmann *et al.*,  
360 2016; Yamaura *et al.*, 2011). Our objective, however, was to evaluate the N-mixture  
361 model for fixed-radius point counts as applied to neotropical forests, a method that  
362 is very commonly used (*e.g.* Blake, 1992). One solution to get accurate estimates by  
363 increasing the area is to discourage the use of point counts in favor of fixed width line  
364 transects. Nonetheless, increasing the area would require a decrease in the number of  
365 sampling units because the objective is to sample a bird community in a 100-ha plot.  
366 This might not be the most favorable solution since our simulations suggest that the  
367 increase in sampling units decreases the bias faster than the increase in replication of  
368 the sampling units (Yamaura *et al.*, 2016; Figure 1; Figure A1). Alternatively, novel  
369 statistical methods allow accurate estimation of abundance using point counts with  
370 no replication (Sólymos *et al.*, 2012; Sólymos & Lele, 2016). In this case, the repli-  
371 cation for detectability estimation is replaced with covariances in the detection and  
372 abundance process. Even though abundance and detection covariates are commonly  
373 accounted for in most point count studies, at small scales (*e.g.* 100 ha plots), abun-



374 dance covariates might be difficult identify because of habitat homogeneity. Such  
375 approaches might be more useful in large scale studies investigating the variation in  
376 abundance of species across the landscape.

377         If the objective of the study is to estimate the abundance of a single species  
378 correcting for its detection probability, then our simulations are a guide to the sam-  
379 pling effort required. Published databases (e.g. Parker III *et al.*, 1996; Karr *et al.*,  
380 1990), include estimates of abundance of many neotropical species, which could pro-  
381 vide general guidelines to researchers in the field about the approximate  $\lambda$  they are  
382 dealing with and thus the approximate sample sizes needed to correctly estimate the  
383 abundance using N-mixture models. For rare species, the solution can be two fold:  
384 increase the sample size to a very high number of points and many replicates ( $>50$   
385 point counts and  $>20$  replicates) or to keep the sampling design of a 36 points and 5  
386 replicates and use our proposed model of the multi-species sampling. We are aware  
387 that in the case of estimating the abundance of rare species, the maximum acceptable  
388 bias that we selected of 10% might be too conservative. In such cases, the acceptable  
389 bias can be increased to 100 or 200% with little risk. Even though we selected the  
390 10% bias across abundances for simplicity, we present depict full results in appendix  
391 A so that researchers are able to make decisions about the sample size required with  
392 the desirable amount of bias in the estimates.

393         We show that by using the information of other more abundant species, the  
394 model is able to predict correctly the abundance of rare species with  $\lambda = 4$  and  
395 better approximate the abundance of species with  $\lambda < 4$ . By restricting the detection  
396 probability of target species to arise from the same distribution than the one of other  
397 species, the beta N-mixture model allocates into estimation of  $\lambda$  the same amount of  
398 information with considerably less parameters (Figure A2). While in the N-mixture  
399 model, allowing  $p$  to vary freely for every species can result in strong estimability  
400 problems between  $p$  and  $\lambda$  (i.e. models with high  $p$  and  $\lambda$  have similar likelihood to

401 models with low  $p$  and high  $\lambda$ ), our beta model appears to be much more reliable and  
402 accurate (mean detection probability of 0.2 and 2.5% and 97.5% quantiles of 0.04 and  
403 0.41 respectively). Such correction, allows the estimate of  $\lambda$ , even for rare species,  
404 to be much closer to the true value (Figure 2; Figure A3 and A4). Even when the  
405 mean detection probability is low ( $p \sim 0.25$ ), the beta model tends to over estimate  
406 the abundance of the entire set of species, but maintains the structure of the species  
407 abundance distribution (Figure 3 and Figure A3).

408 Our model is different from other approaches to multi-species abundance and  
409 occurrence estimation (Dorazio & Royle, 2005; Yamaura *et al.*, 2011; Dorazio *et al.*,  
410 2015; Sollmann *et al.*, 2016) because we do not assume that detection probabilities of  
411 species are unrelated quantities. The assumption of a common detection probability  
412 allow us to make inferences about the abundance of rare species that are usually  
413 discarded when estimating the composition of communities. Yamaura *et al.* (2011)  
414 made similar assumptions in which species respond as a community to changes in  
415 environmental covariates. However, we assume that the detections of species are the  
416 product of a stochastic process, instead of deterministically predicting the detection  
417 probability for each species as a function of some other covariates. An important  
418 consideration of our approach is that the grouping of species used to estimate the  
419 distribution of detection probabilities has to be carefully justified and informed by  
420 their ecology and vocal behavior. In our (field) experience makes little sense to assume  
421 that species that are extremely different in their ecologies have detection probabilities  
422 drawn from the same probability distribution.

423 Martin *et al.* (2011) and Dorazio *et al.* (2013) used a similar approach to ours,  
424 but for single-species abundance estimation. In their models, they assumed correlated  
425 behavior among the individuals of the same species and variation across sites, adding  
426 an additional layer of hierarchy to the traditional N-mixture models (Royle, 2004). In  
427 their model, the binomial distribution is substituted by a beta binomial that assumes

428 that the probability of detecting one individual is slightly different from another, but  
429 the result of the same stochastic process. Similarly, in this study we assumed that  
430 species have their own detection probability which for species with similar ecologies  
431 is drawn from the same probability distribution. However, following the sampling  
432 structure of the point counts, our model averages out all the possible realizations of  
433 the beta process after taking into account the poisson sampling layer, and thus the  
434 likelihood function becomes an intractable integral. After integration, the likelihood  
435 matches a multivariate distribution (Sibuya *et al.*, 1964) whose covariance structure  
436 arises naturally from the sampling scheme. Fortunately, the Data Cloning algorithm  
437 allows us to make Maximum likelihood inferences without having to solve this integral.

438       Because our model is essentially identical to any N-mixture model, it has the  
439 advantage that it can be adapted to any underlying distribution of abundances. Sim-  
440 ilarly, the Poisson distribution used to model the mean number of individuals can  
441 be replaced by any other distribution that relaxes the homogeneity assumption (e.g.  
442 Negative Binomial or Zero Inflated Poisson). In addition, ecological inferences can be  
443 made by incorporating covariates of the abundance process in the model as previously  
444 suggested with N-mixture models (Joseph *et al.*, 2009). The detection process can  
445 also depend on variables influencing the overall detectability of species by making  
446 the parameters of the beta distribution a function of the covariates. For example,  
447 one can assume that the detection probability distribution is a function of variables  
448 such as the ecological guild a bird belongs to or to the microhabitat used for foraging  
449 and nesting. Model selection comparing models with and without abundance and  
450 detection covariates can be useful for inferring ecological mechanisms underlying the  
451 abundance of species (Joseph *et al.*, 2009). In the beta N-mixture model, the assump-  
452 tion of the correlated behavior can be tested by comparing it to a regular N-mixture  
453 model, and because the main difference is in the assumptions underlying detection  
454 probability, it allows us to make inferences about ecological similarity among species

455 in the same guild, habitat or functional group.

456         The estimates of the abundance of the understory insectivores of the upper  
457 Magdalena Valley show that the difference between the N-mixture and beta-mixture  
458 models relies on the estimation of the abundance of rare species. For example, for  
459 species with less than five detections, the N-mixture model estimates the abundance  
460 to be extremely high (Table 1). Instead, by assuming the detection probability is  
461 correlated with the other species in the set, our approach lowers the estimation of  
462 the abundance to values closer to densities reported for the same species or similar  
463 in other regions (e.g., Karr *et al.*, 1990; Parker III *et al.*, 1996). It is worth noting  
464 that the abundance of more common species with higher numbers of detections in  
465 our dataset might be a little bit higher than in other published data sets. There are  
466 three possible reasons for this. First, when the mean detection probability of the  
467 species is low, our simulations showed that the beta-mixture model overestimated  
468 the true abundance of species (Figure A3). The second reason is more ecological:  
469 the data presented here comes from the dry forests of the Magdalena valley. Even  
470 though this ecosystem is a less species rich than wet forest ecosystems, the biomass of  
471 the community does not change (Gomez *et al.* unpublished data). This means that  
472 the populations of most species tend might be higher than in wet forests from which  
473 most of the abundance data for neotropical birds have been collected (Terborgh *et al.*,  
474 1990; Thiollay, 1994; Robinson *et al.*, 2000; Blake, 2007). Third, it is also possible  
475 that rare species do not have to sing much to defend their territories because they  
476 have few neighbors. Common species, on the other hand, face a constant threat of  
477 territorial intrusion and may have to sing more.

478         Overall, our study can be used as a baseline to determine the number of point  
479 counts required to estimate the density of neotropical bird species using N-mixture  
480 models. We showed that for many species in neotropical communities, the sample  
481 size needed to correctly estimate their density is high and thus we advocate for more

482 field intensive methods such as spot mapping. Probably, in the neotropics, the needed  
483 spatial resolution will be larger areas than the standard 100-ha plot because of the  
484 very large number of species with fewer than 2 territories/100ha. Distance sampling  
485 could also be used as an alternative method, but it has been previously shown that  
486 it requires a high number of detections to appropriately estimate the abundance of  
487 species (Matsuoka *et al.*, 2014). Such high number of detections might be impossible  
488 to achieve, particularly for rare species. We conclude that our method might be a  
489 good alternative when sample sizes are low, but information for many other species is  
490 available. We expect that for large communities implementing our model using data  
491 cloning would be a computer intensive task. Also, in large neotropical communities,  
492 the assumption of detectabilities arising from the same probability distribution might  
493 not hold for many species. Here, we showed an example in which we estimated the  
494 abundance of 26 species of insectivorous birds in the Magdalena Valley, allowing us  
495 to demonstrate that for a community of this size, the maximum likelihood estima-  
496 tion with this size of community is feasible. Such approach represents a significant  
497 practical improvement for neotropical bird studies. We also note that the larger the  
498 community, the easier it will be for the model to estimate the abundance of rare  
499 species (Sollmann *et al.*, 2016), but there is a tradeoff with the computational power  
500 needed for ML estimation.

501 Estimation of animal abundances is the ecologists' starting point to confront  
502 novel theoretical models and hypotheses with evidence in nature, and this scientists'  
503 field has long understood the importance of such task (*e.g.*, Seber, 1986). It is in that  
504 sense that we hope that our work is seen as a practical, and easy to use extension of  
505 the N-mixture models. Our work shows that the approach that we propose can serve  
506 as a platform to design community ecology studies that require, as a starting point,  
507 the joint estimation of abundances while taking into account differences in detection  
508 probabilities among species.

## 509 **5 Acknowledgements**

510 We would like to thank the farm owners Cesar Garcia, Hacienda los Limones and  
511 Constanza Mendoza for allowing us to perform bird counts in their properties. Gordon  
512 Burleigh, Bette Loiselle, David Steadman and Philip Shirk provided useful comments  
513 for the development of the model and improvement of the manuscript.

## 514 **References**

- 515 Blake, J.G. (1992) Temporal variation in point counts of birds in a lowland wet forest  
516 in costa rica. *The Condor*, pp. 265–275.
- 517 Blake, J.G. (2007) Neotropical forest bird communities: a comparison of species rich-  
518 ness and composition at local and regional scales. *The Condor*, **109**, 237–255.
- 519 Buckland, S.T., Anderson, D.R., Burnham, K.P. & Laake, J.L. (1993) *Distance Sam-*  
520 *pling: estimating abundance of biological populations*. Chapman and Hall, London.
- 521 de Valpine, P. (2012) Frequentist analysis of hierarchical models for population dy-  
522 namics and demographic data. *Journal of Ornithology*, **152**, 393–408.
- 523 Denes, F.V., Silveira, L.F. & Beissinger, S.R. (2015) Estimating abundance of un-  
524 marked animal populations: accounting for imperfect detection and other sources  
525 of zero inflation. *Methods in Ecology and Evolution*, **6**, 543–556.
- 526 Dorazio, R.M., Connor, E.F. & Askins, R.A. (2015) Estimating the effects of habitat  
527 and biological interactions in an avian community. *PloS one*, **10**, e0135987.
- 528 Dorazio, R.M., Martin, J. & Edwards, H.H. (2013) Estimating abundance while ac-  
529 counting for rarity, correlated behavior, and other sources of variation in counts.  
530 *Ecology*, **94**, 1472–1478.

- 531 Dorazio, R.M. & Royle, J.A. (2005) Estimating size and composition of biological  
532 communities by modeling the occurrence of species. *Journal of the American Sta-*  
533 *tistical Association*, **100**, 389–398.
- 534 Hubbell, S.P. (2001) *The unified neutral theory of biodiversity and biogeography*, vol-  
535 ume 32. Princeton University Press, Princeton, NY.
- 536 Joseph, L.N., Elkin, C., Martin, T.G. & Possingham, H.P. (2009) Modeling abun-  
537 dance using n-mixture models: the importance of considering ecological mecha-  
538 nisms. *Ecological Applications*, **19**, 631–642.
- 539 Karr, J.R., Robinson, S.K., Blake, J.G., Bierregaard Jr, R.O. & Gentry, A. (1990)  
540 Birds of four neotropical forests. A.H. Gentry, ed., *Four neotropical rainforests*, pp.  
541 237–269. Yale University Press New Haven, Connecticut.
- 542 Lele, S.R., Dennis, B. & Lutscher, F. (2007) Data cloning: easy maximum likelihood  
543 estimation for complex ecological models using bayesian markov chain monte carlo  
544 methods. *Ecology letters*, **10**, 551–563.
- 545 Lele, S.R., Nadeem, K. & Schmuland, B. (2010) Estimability and likelihood inference  
546 for generalized linear mixed models using data cloning. *Journal of the American*  
547 *Statistical Association*, **105**, 1617–1625.
- 548 MacKenzie, D.I., Nichols, J.D., Lachman, G.B., Droege, S., Andrew Royle, J. & Lang-  
549 timm, C.A. (2002) Estimating site occupancy rates when detection probabilities are  
550 less than one. *Ecology*, **83**, 2248–2255.
- 551 Martin, J., Royle, J.A., Mackenzie, D.I., Edwards, H.H., Kery, M. & Gardner, B.  
552 (2011) Accounting for non-independent detection when estimating abundance of  
553 organisms with a bayesian approach. *Methods in Ecology and Evolution*, **2**, 595–  
554 601.

- 555 Martin, T.G., Wintle, B.A., Rhodes, J.R., Kuhnert, P.M., Field, S.A., Low-Choy,  
556 S.J., Tyre, A.J. & Possingham, H.P. (2005) Zero tolerance ecology: improving  
557 ecological inference by modeling the source of zero observations. *Ecology letters*, **8**,  
558 1235–1246.
- 559 Matsuoka, S.M., Mahon, C.L., Handel, C.M., Sólymos, P., Bayne, E.M., Fontaine,  
560 P.C. & Ralph, C.J. (2014) Reviving common standards in point-count surveys for  
561 broad inference across studies. *The Condor*, **116**, 599–608.
- 562 McGill, B.J., Etienne, R.S., Gray, J.S., Alonso, D., Anderson, M.J., Benecha, H.K.,  
563 Dornelas, M., Enquist, B.J., Green, J.L., He, F., Hurlbert, A.H., Magurran, A.E.,  
564 Marquet, P.A., Maurer, B.A., Ostling, A., Soykan, C.U., Ugland, K.I. & White,  
565 E.P. (2007) Species abundance distributions: moving beyond single prediction the-  
566 ories to integration within an ecological framework. *Ecology letters*, **10**, 995–1015.
- 567 Munn, C.A. & Terborgh, J.W. (1979) Multi-species territoriality in neotropical for-  
568 aging flocks. *The Condor*, **81**, 338–347.
- 569 Olson, D.M., Dinerstein, E., Wikramanayake, E.D., Burgess, N.D., Powell, G.V.,  
570 Underwood, E.C., D'amico, J.A., Itoua, I., Strand, H.E., Morrison, J.C. *et al.*  
571 (2001) Terrestrial ecoregions of the world: A new map of life on earth a new global  
572 map of terrestrial ecoregions provides an innovative tool for conserving biodiversity.  
573 *BioScience*, **51**, 933–938.
- 574 Parker III, T., Stotz, D. & Fitzpatrick, J. (1996) Ecological and distributional  
575 databases for neotropical birds. D. Stotz, J. Fitzpatrick, T. Parker III &  
576 D. Moskovits, eds., *Neotropical birds: ecology and conservation*. University of  
577 Chicago Press, Chicago.
- 578 Pielou, E.C. (1969) *An introduction to mathematical ecology*. Wiley-Interscience, New  
579 York.



- 580 Plummer, M. (2014) *rjags: Bayesian graphical models using MCMC*. R package  
581 version 3-13.
- 582 Ponciano, J.M., Burleigh, J.G., Braun, E.L. & Taper, M.L. (2012) Assessing param-  
583 eter identifiability in phylogenetic models using data cloning. *Systematic biology*,  
584 **61**, 955–972.
- 585 Ponciano, J.M., Taper, M.L., Dennis, B. & Lele, S.R. (2009) Hierarchical models in  
586 ecology: confidence intervals, hypothesis testing, and model selection using data  
587 cloning. *Ecology*, **90**, 356–362.
- 588 R Core Team (2013) *R: A Language and Environment for Statistical Computing*. R  
589 Foundation for Statistical Computing, Vienna, Austria.
- 590 Ralph, C.J., Geupel, G.R., Pyle, P., Martin, T.E. & DeSante, D.F. (1993) Handbook  
591 of field methods for monitoring landbirds. *USDA Forest Service/UNL Faculty*  
592 *Publications*, p. 105.
- 593 Ralph, C.J., Sauer, J.R. *et al.* (1995) Monitoring bird populations by point counts.  
594 *USDA Forest Service General Technical Report PSW-GTR-149*, pp. 161–175.
- 595 Robinson, W.D., Brawn, J.D. & Robinson, S.K. (2000) Forest bird community struc-  
596 ture in central panama: influence of spatial scale and biogeography. *Ecological*  
597 *Monographs*, **70**, 209–235.
- 598 Royle, J.A. (2004) N-mixture models for estimating population size from spatially  
599 replicated counts. *Biometrics*, **60**, 108–115.
- 600 Royle, J.A. & Dorazio, R.M. (2008) *Hierarchical modeling and inference in ecology:*  
601 *the analysis of data from populations, metapopulations and communities*. Academic  
602 Press, San Diego, CA.

- 603 Seber, G.A. (1986) A review of estimating animal abundance. *Biometrics*, **42**, 267–  
604 292.
- 605 Sibuya, M., Yoshimura, I. & Shimizu, R. (1964) Negative multinomial distribution.  
606 *Annals of the Institute of Statistical Mathematics*, **16**, 409–426.
- 607 Sollmann, R., Gardner, B., Williams, K.A., Gilbert, A.T. & Veit, R.R. (2016) A  
608 hierarchical distance sampling model to estimate abundance and covariate as-  
609 sociations of species and communities. *Methods in Ecology and Evolution*, doi:  
610 **10.1111/2041-210X.12518**.
- 611 Sólymos, P., Lele, S. & Bayne, E. (2012) Conditional likelihood approach for analyzing  
612 single visit abundance survey data in the presence of zero inflation and detection  
613 error. *Environmetrics*, **23**, 197–205.
- 614 Sólymos, P. & Lele, S.R. (2016) Revisiting resource selection probability functions  
615 and single-visit methods: clarification and extensions. *Methods in Ecology and*  
616 *Evolution*, **7**, 196–205.
- 617 Terborgh, J., Robinson, S.K., Parker III, T.A., Munn, C.A. & Pierpont, N. (1990)  
618 Structure and organization of an amazonian forest bird community. *Ecological*  
619 *Monographs*, **60**, 213–238.
- 620 Thiollay, J.M. (1994) Structure, density and rarity in an amazonian rainforest bird  
621 community. *Journal of Tropical Ecology*, **10**, 449–481.
- 622 Yamaura, Y., Andrew Royle, J., Kuboi, K., Tada, T., Ikeno, S. & Makino, S. (2011)  
623 Modelling community dynamics based on species-level abundance models from de-  
624 tection/nondetection data. *Journal of applied ecology*, **48**, 67–75.
- 625 Yamaura, Y., Kéry, M. & Royle, J.A. (2016) Study of biological communities sub-

626     ject to imperfect detection: bias and precision of community n-mixture abundance  
627     models in small-sample situations. *Ecological Research*, **31**, 289–305.

628 **6 Tables**

| Species                               | Detections | N-mixture |           |           | Beta  |        |
|---------------------------------------|------------|-----------|-----------|-----------|-------|--------|
|                                       |            | $p$       | $\lambda$ | $\lambda$ | lower | upper  |
| <i>Atalotriccus pilaris</i>           | 83         | 0.315     | 119.7     | 119.8     | 67.9  | 171.7  |
| <i>Basileuterus rufifrons</i>         | 104        | 0.219     | 215.4     | 214.9     | 104.3 | 325.5  |
| <i>Campylorhynchus griseus</i>        | 7          | 0.311     | 10.2      | 10.5      | 0     | 22.2   |
| <i>Cantorchilus leucotis</i>          | 3          | 0.0004    | 3832.3    | 32.5      | 0     | 193.0  |
| <i>Cnemotriccus fuscatus</i>          | 31         | 0.174     | 80.9      | 78.7      | 8.5   | 149.0  |
| <i>Contopus cinereus</i>              | 2          | 0.004     | 211.4     | 14.4      | 0     | 69.9   |
| <i>Cymbilaimus lineatus</i>           | 4          | 0.0005    | 3663.8    | 41.1      | 0     | 181.2  |
| <i>Dromococcyx phasianellus</i>       | 1          | 0.0005    | 905.9     | 6.3       | 0     | 39.9   |
| <i>Elaenia flavogaster</i>            | 67         | 0.126     | 241.3     | 231.4     | 62.1  | 400.6  |
| <i>Euscarthmus meloryphus</i>         | 26         | 0.265     | 44.6      | 44.3      | 14.9  | 73.8   |
| <i>Formicivora grisea</i>             | 172        | 0.280     | 279.3     | 279.5     | 168.7 | 390.3  |
| <i>Hemitriccus margaritaceiventer</i> | 106        | 0.408     | 118.1     | 118.4     | 81.8  | 155.0  |
| <i>Henicorhina leucosticta</i>        | 28         | 0.124     | 102.3     | 95.5      | 0     | 201.3  |
| <i>Hylophilus flavipes</i>            | 144        | 0.064     | 1023.2    | 829.2     | 0     | 2086.4 |
| <i>Leptopogon amaurocephalus</i>      | 23         | 0.194     | 53.8      | 53.0      | 9.5   | 96.6   |
| <i>Myrmeciza longipes</i>             | 64         | 0.257     | 113.4     | 113.0     | 55.8  | 170.2  |
| <i>Myrmotherula pacifica</i>          | 1          | 0.001     | 905.9     | 5.9       | 0     | 32.1   |
| <i>Pheugopedius fasciatoventris</i>   | 83         | 0.230     | 164.0     | 163.1     | 77.2  | 249.0  |
| <i>Poecilotriccus sylvia</i>          | 69         | 0.239     | 131.0     | 130.0     | 52.6  | 207.3  |
| <i>Ramphocaenus melanurus</i>         | 5          | 0.206     | 11.0      | 11.0      | 0     | 29.0   |
| <i>Synallaxis albescens</i>           | 1          | 0.0005    | 905.9     | 6.4       | 0     | 48.7   |
| <i>Thamnophilus atrinucha</i>         | 93         | 0.255     | 165.9     | 165.5     | 92.4  | 238.6  |
| <i>Thamnophilus doliatus</i>          | 192        | 0.246     | 354.5     | 353.8     | 186.3 | 521.2  |
| <i>Todirostrum cinereum</i>           | 51         | 0.255     | 91.1      | 90.3      | 44.2  | 136.4  |
| <i>Tolmomyias sulphurescens</i>       | 80         | 0.216     | 168.4     | 166.5     | 75.4  | 257.7  |
| <i>Troglodytes aedon</i>              | 26         | 0.322     | 36.7      | 37.2      | 13.5  | 60.8   |

Table 1: Estimates for understory insectivorous birds in the dry forest of the Magdalena Valley Colombia. Estimates are in individuals/100 ha

## 629 7 Figures

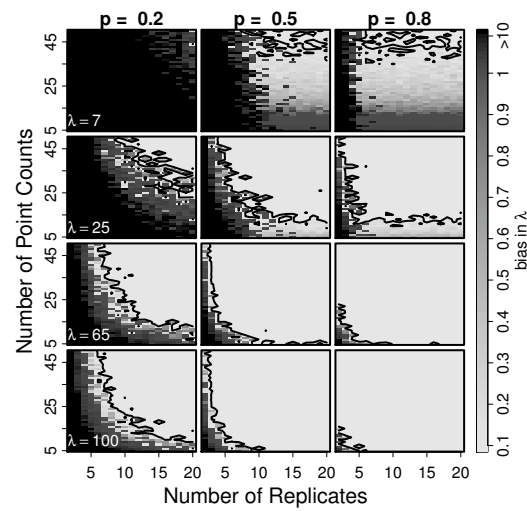

Figure 1: Mean bias in mean number of individuals per 100 ha  $\lambda$  for a range of point counts, number of replicates, and true parameter values to for mid low and high abundances and detection probabilities ( $\lambda = 7, 25, 65, 100$  and  $p = 0.2, 0.5, 0.8$ ). The grayscale in each panel represent the bias from low (light gray) to high (black). The color scale is presented in the right. We selected a threshold for acceptable bias in estimation of abundance of 0.1 which isocline is presented as a black line in each of the panels. The results for the entire set of simulations are presented in a similar figure in appendix A

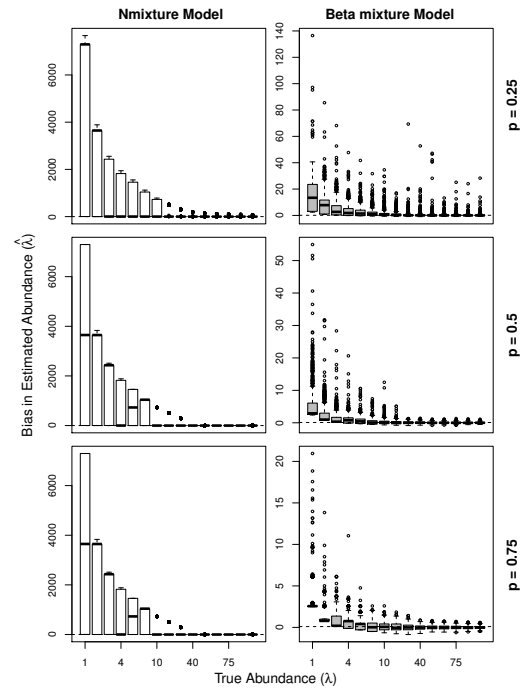

Figure 2: Bias in the estimated value of  $\lambda$  for both the N-mixture and beta N-mixture model for 1000 simulations of data under three different scenarios of low, mid and high detection probabilities and 36 point counts replicated each five times.

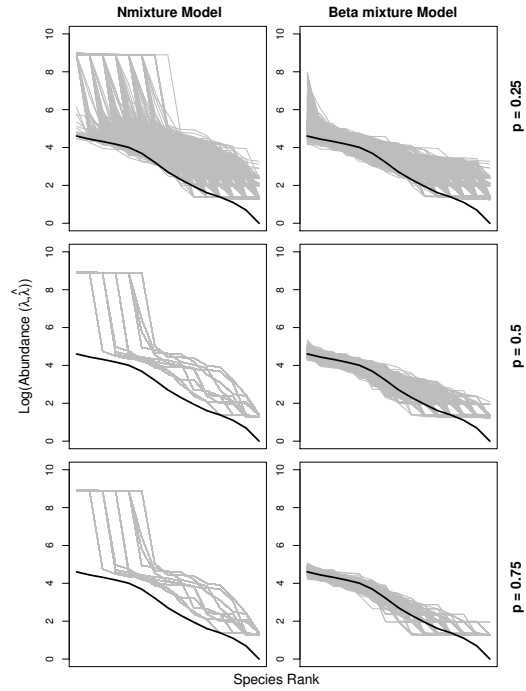

Figure 3: True (black) and each of the estimated species abundance (gray) distributions from the 1000 simulations of data under three different scenarios of low, mid and high detection probabilities.

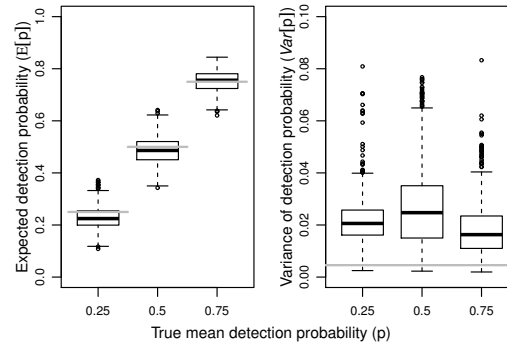

Figure 4: Distribution of Expected ( $E[p]$ ) and variance ( $\text{Var}[p]$ ) in detection probability across the 1000 simulations performed under scenarios of low, mid and high  $E[p]$  and the same variance  $\text{Var}[p]$ .



630 **A** **Supplementary Figures**

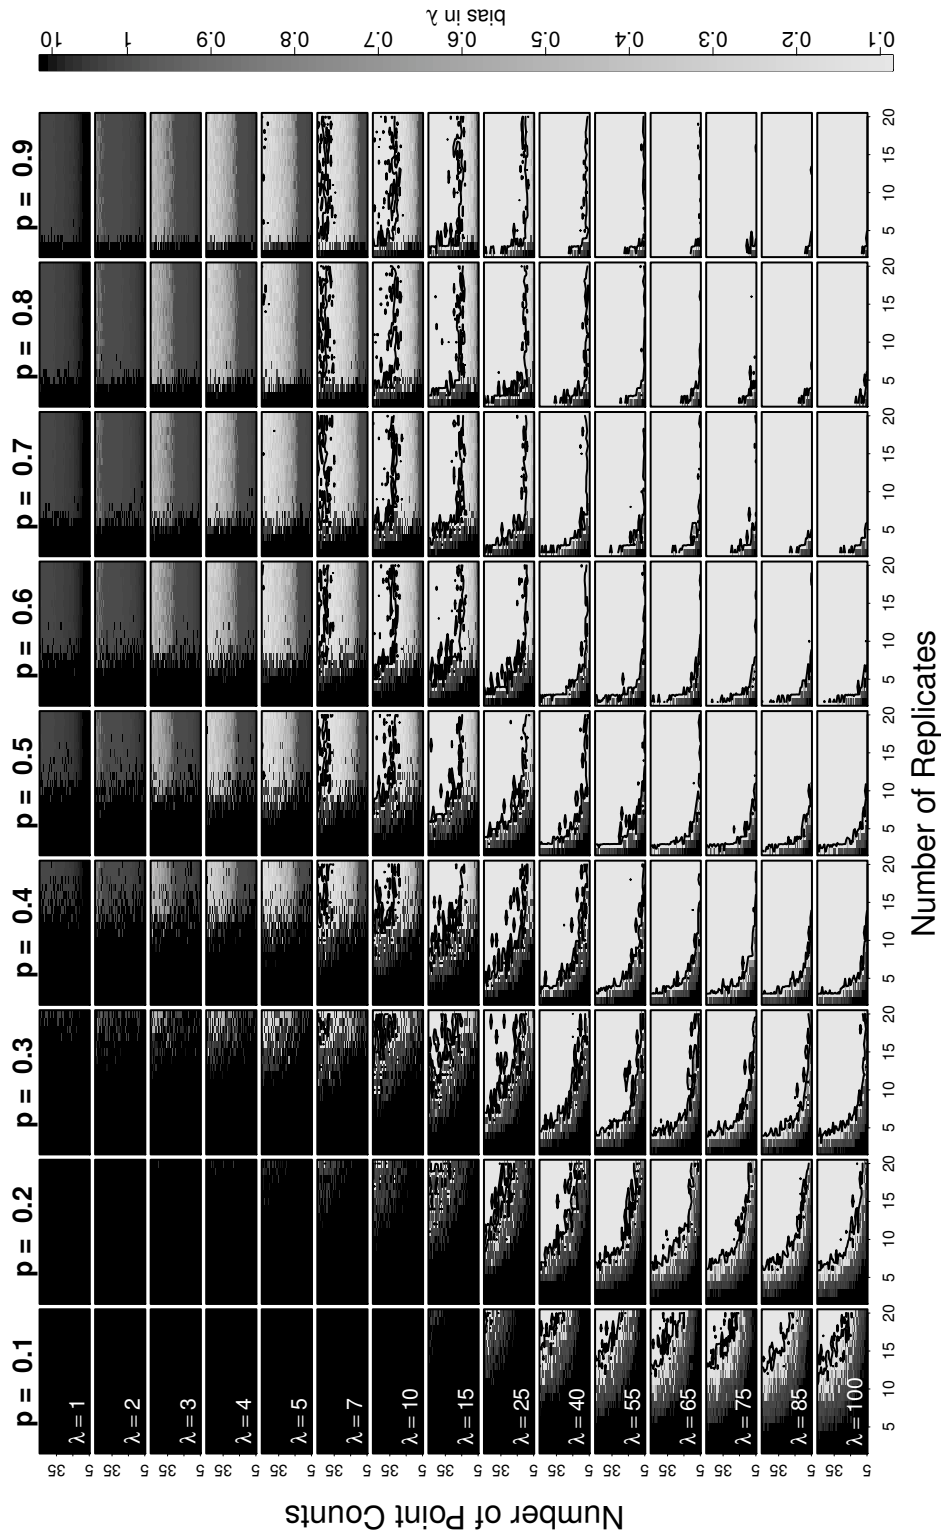

Figure A1: Mean bias in mean number of individuals per 100 ha  $\lambda$  for range of point counts, number of replicates, and true parameter values for low, mid and high abundances and detection probabilities ( $\lambda = 7, 25, 65, 100$  and  $p = 0.2, 0.5, 0.8$ ). The grayscale in each panel represent the bias from low (light gray) to high (black). The color scale is presented in the right. We selected a threshold for acceptable bias in estimation of abundance of 0.1, which is the isocline presented as a black line in each of the panels.

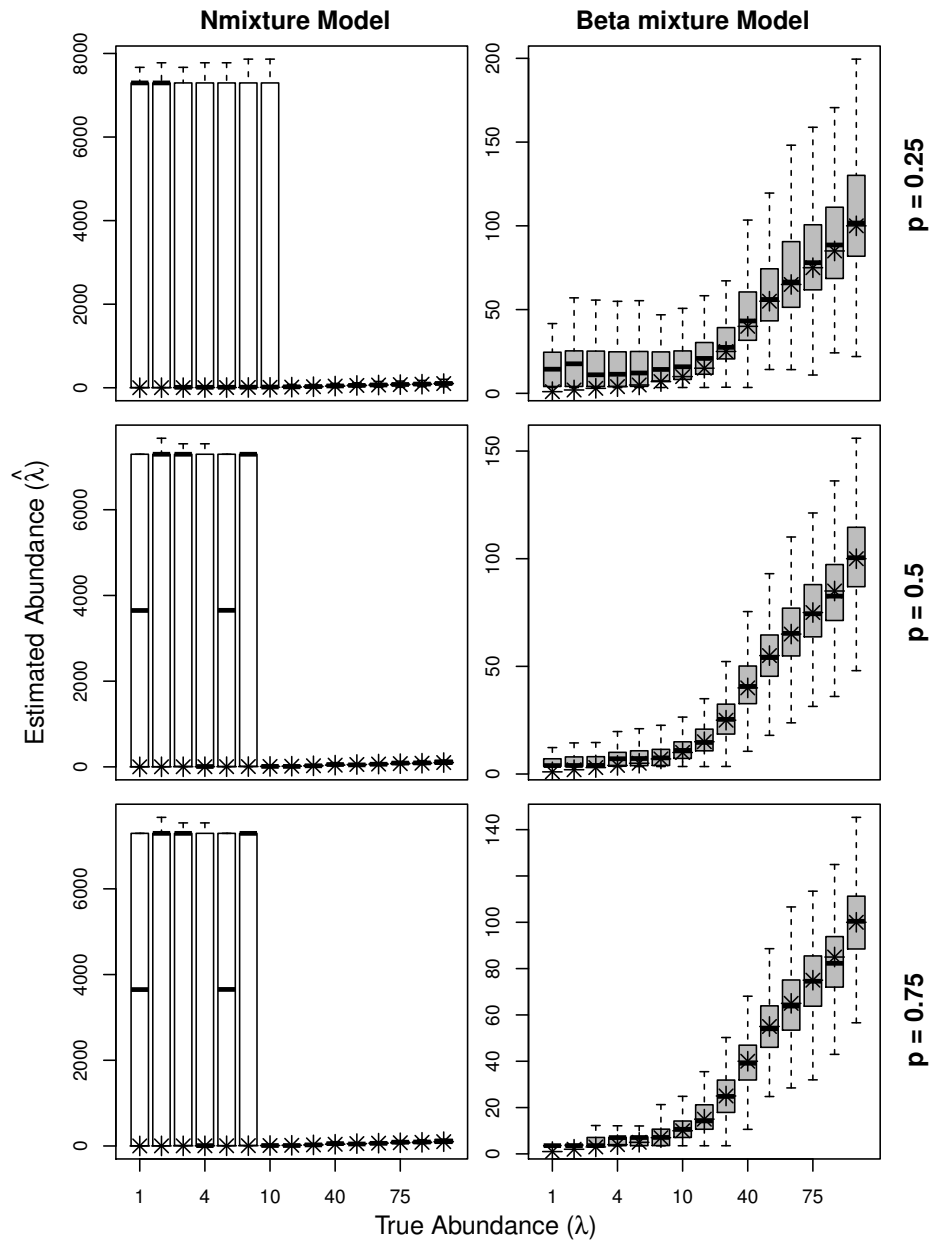

Figure A2: Histogram of estimated detection probabilities based on the N-mixture model estimates of 26 understory insectivorous birds of the dry forest of the Magdalena Valley Colombia. The distribution of the detection probabilities estimated by the beta model is also shown (black dotted line) based on the parameters estimated as  $\alpha = 3.15$  and  $\beta = 12.7$

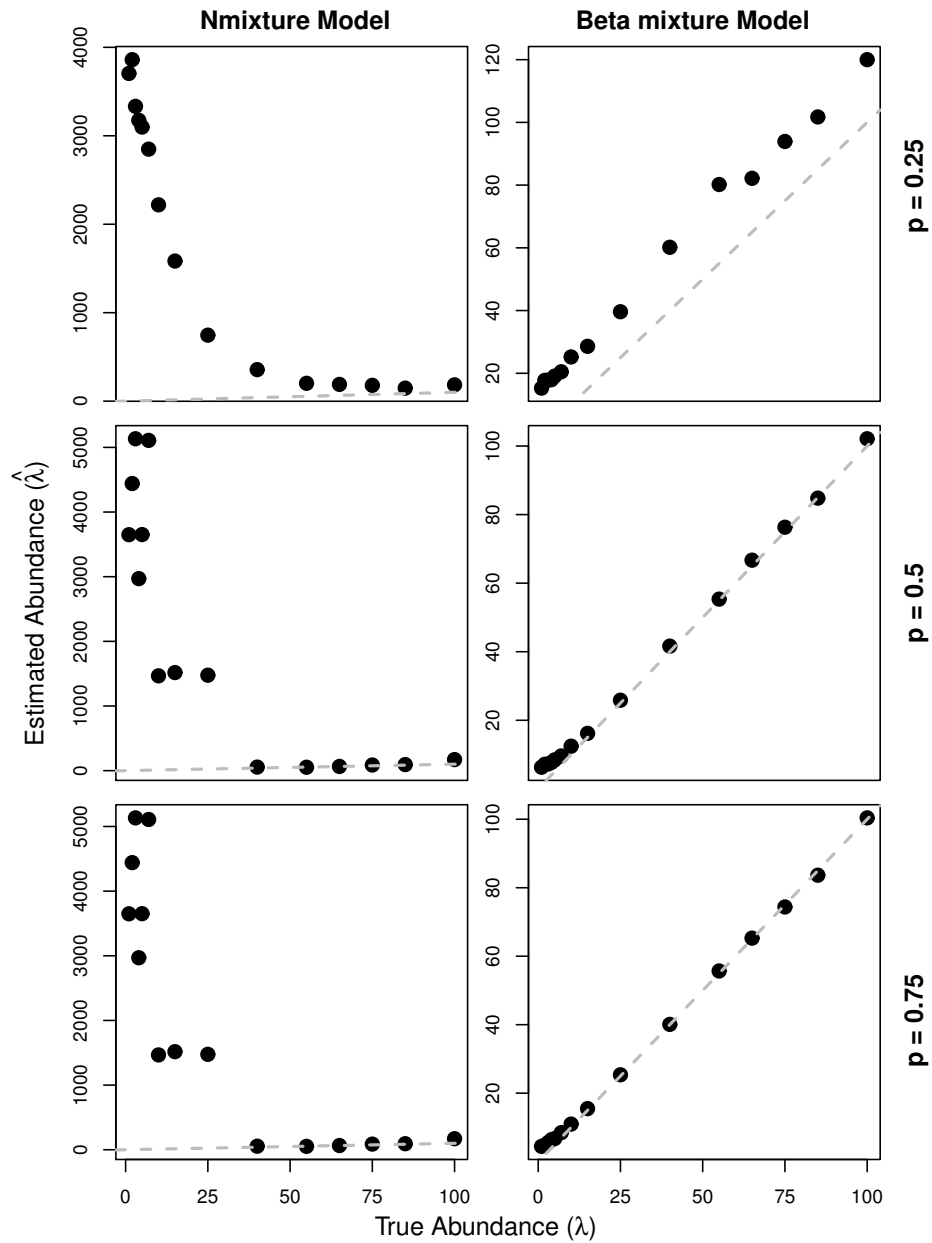

Figure A3: Barplot showing the distribution of  $\hat{\lambda}$  using N-mixture and beta N-mixture models, showing the location of the true value of  $\lambda$ . The outliers for the N-mixture and beta N-mixture models have been omitted for clarity.

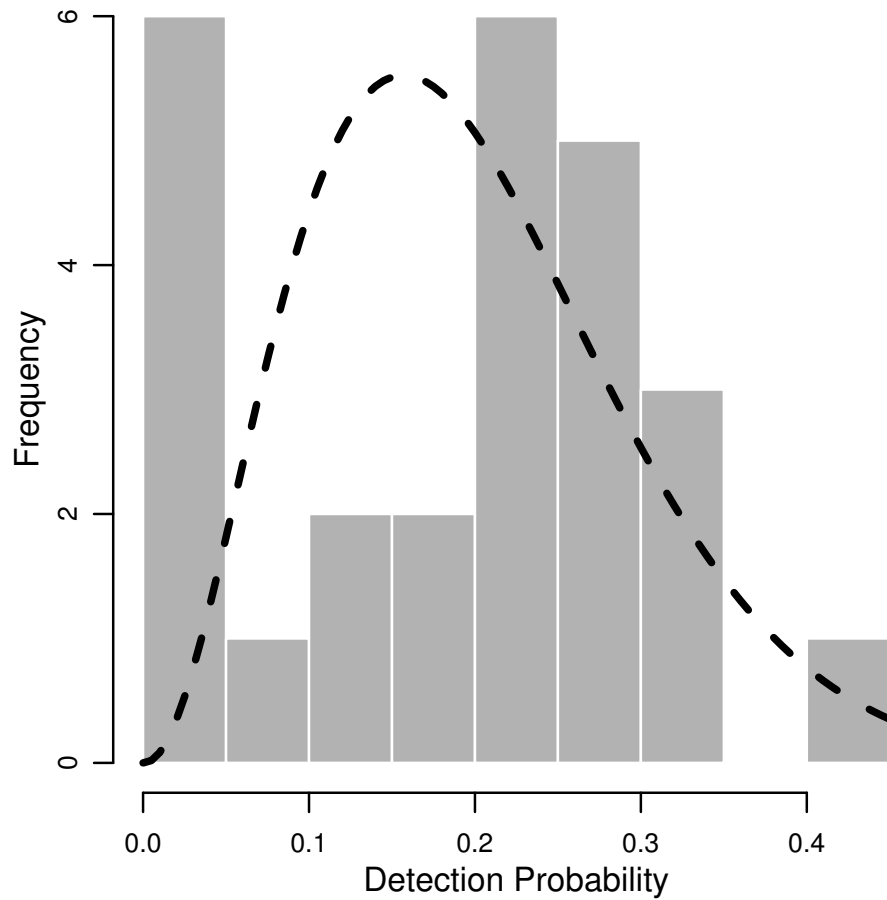

Figure A4: Relationship between the mean value of  $\hat{\lambda}$  from the 1000 simulations and the true value of  $\lambda$ . For reference, we show the one-to-one relationship line (gray dotted line).

## 631 **B R Code**

632 Appendix B contains the source codes necessary for estimating abundance using the  
633 Beta N-mixture model. It is based on bugs specification of the model, R functions for  
634 abundance estimation using N-mixture model and the R code necessary to reproduce  
635 the example using real data. The data have been saved in a separate file named  
636 UIFcounts.RData.
